# Supplementary material for: In silico-designed mutations increase variable new-antigen receptor single-domain antibodies for VEGF165 neutralization
Source: PubMed Central journal article supplement (PMC6021326; doi:10.18632/oncotarget.25549), 2018-06-15
Supplement: oncotarget-09-28016-s001.pdf [file oncotarget-09-28016-s001.pdf]

## ***In silico-designed* mutations increase variable new-antigen receptor single-domain antibodies for VEGF<sub>165</sub> neutralization**

### **SUPPLEMENTARY MATERIALS**

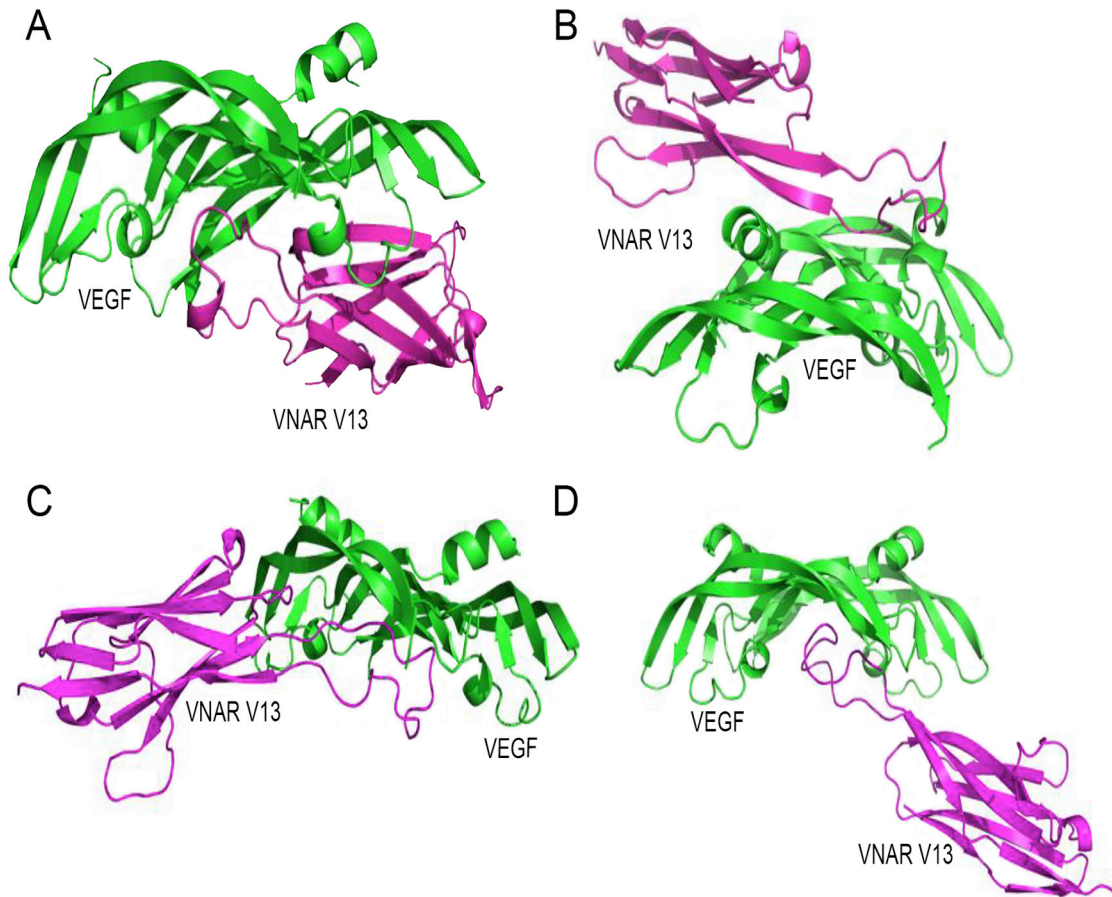

**Supplementary Figure 1: Models of VNAR V13-VEGF<sub>165</sub> protein-protein interactions.** V13 (magenta)-VEGF<sub>165</sub> (green): (A) Model A, (B) Model B, (C) Model C, (D) Model D.

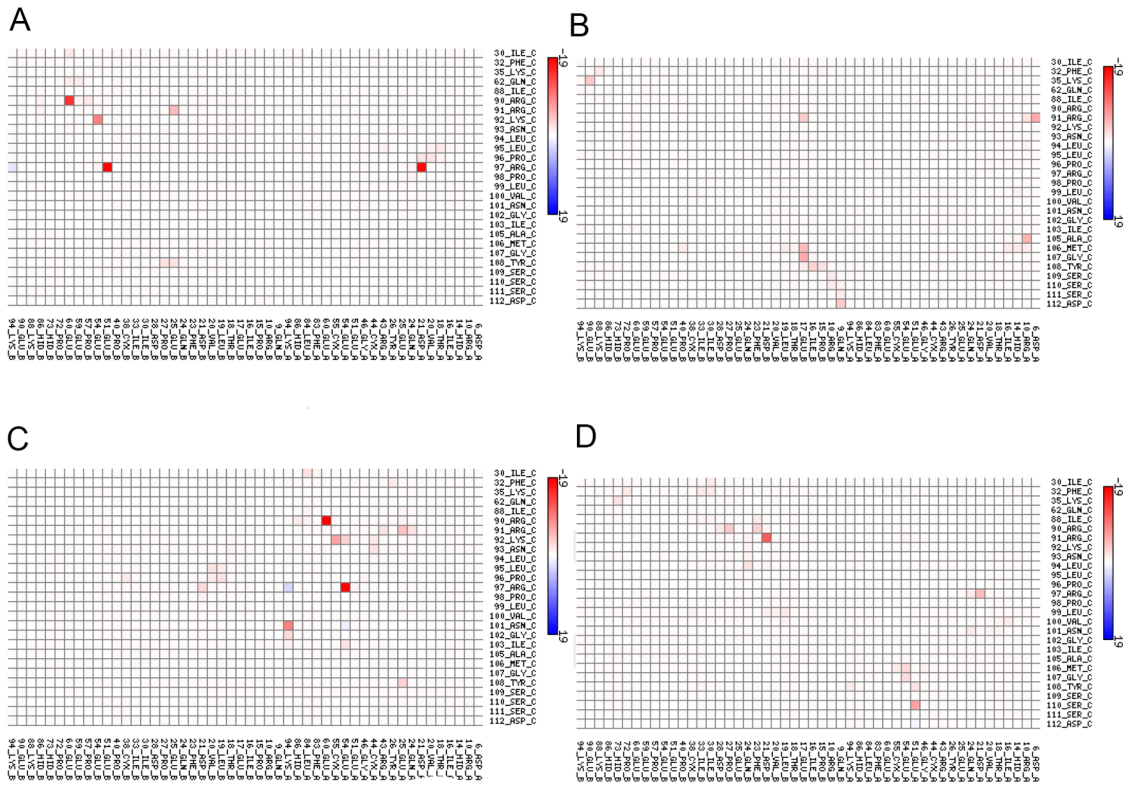

**Supplementary Figure 2: Interaction maps of VEGF<sub>165</sub>-V13 complexes.** Shown areinteractions between V13 (represented in vertically) and VEGF<sub>165</sub> (represented horizontally) complexes. The color scale is based on the value of the interaction energy: redder indicates more favorable interactions, while the bluer tint is less favorable. **(A)** Model A, **(B)** Model B, **(C)** Model C, **(D)** Model D.

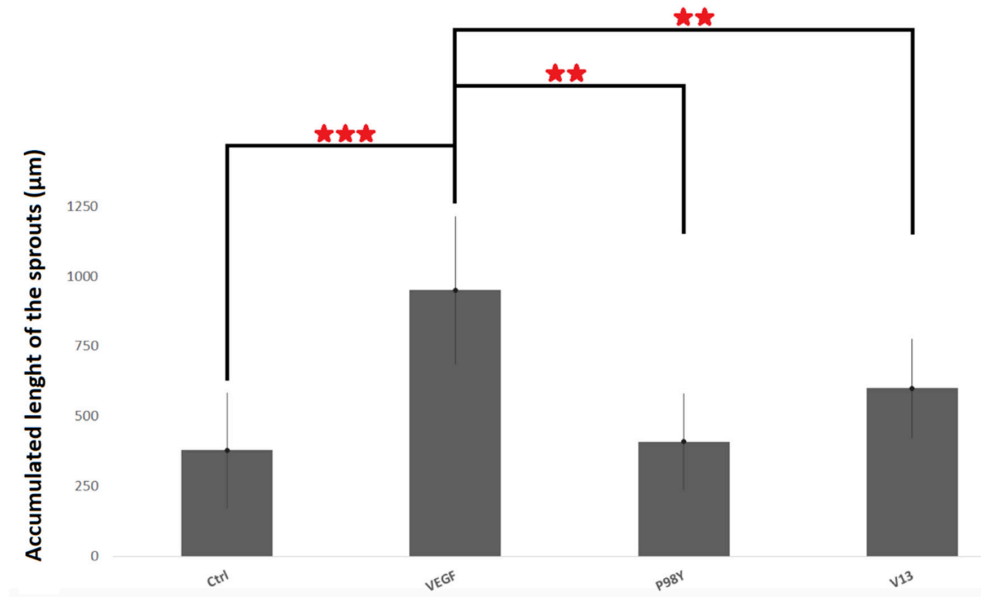

**Supplementary Figure 3: Measurement of branch length in endothelial cell spheroids stimulated with VEGF<sub>165</sub>.** Statistical differences were observed with VEGF when compared to the control group, P98Y and V13. A highly significant statistical difference ( $P < 0.001^{***}$ ) was observed between the control group and the VEGF group. Very significant statistical differences ( $P < 0.01^{**}$ ) were observed in the ramification length of the treatment groups P987Y and V13 when compared to the VEGF group.

**Supplementary Table 1: VNAR V13 conformations by MD**

|   | <b>Conformation</b>                                                                | <b>Number of structures</b> | <b>Existence time (ns)</b> |
|---|------------------------------------------------------------------------------------|-----------------------------|----------------------------|
| 1 |   | 158                         | 3.2                        |
| 2 |   | 1821                        | 36.3                       |
| 3 |   | 203                         | 4.0                        |
| 4 |   | 2074                        | 41.4                       |
| 5 |  | 756                         | 15.1                       |
